# Supplementary material for: UDP-glucose pyrophosphorylase: genome-wide identification, expression and functional analyses in Gossypium hirsutum
Source: PeerJ. 2022 May 30;10:e13460. doi: 10.7717/peerj.13460 (PMC9161816; doi:10.7717/peerj.13460)
Supplement: Supplemental Information 2 [file peerj-10-13460-s002.xlsx]

## Sheet: Sheet1
Table 1 66 UGP gene classifications
Subfamily	Subgroup	Gene
UGP-Ⅰ	A	Gorai.008G132300.1
	A	GB_D10G1799.1
	A	GB_D04G1306.1
	A	GH_D11G1805.1
	A	GB_D11G1820.1
	A	GH_A11G1773.1
	A	GB_A11G1777.1
	A	Gorai.007G188400.1
	A	Ga11G2215.1
	A	GH_A08G0422.1
	A	GB_A08G0429.1
	A	Ga08G0443.1
	A	GH_D08G0444.1
	A	GB_D08G0435.1
	A	Gorai.004G048300.1
	B	GH_A07G1819.1
	B	Ga11G1427.1
	B	GH_A11G2500.1
	B	GB_A11G2562.1
	B	Gorai.007G250600.1
	B	GH_D11G2547.1
	B	GB_D11G2576.1
	C	Gorai.002G159200.1
	C	GH_D01G1492.1
	C	Gorai.001G152100.1
	C	GB_D11G2470.1
	C	GB_D12G1985.1
	C	GB_D09G0263.1
	C	GB_D01G1612.1
	C	GB_D04G0528.1
UGP-Ⅱ	D	GB_D02G2659.1
	D	GH_D02G2606.1
	D	Gorai.005G268300.1
	D	GH_A03G2444.1
	D	GB_A03G2528.1
	D	Ga03G2792.1
	D	Ga12G2624.1
	D	GH_A12G0472.1
	D	GB_A12G0491.1
	D	Gorai.008G049800.1
	D	GH_D12G0484.1
	D	GB_D12G0489.1
	E	GB_A10G0389.1
	E	GB_A10G2815.1
	E	Ga10G0079.1
	E	Gorai.011G291300.1
	E	GH_D10G2749.1
	E	GB_D10G2773.1
	F	Gorai.005G087200.1
	F	Ga05G2532.1
	F	GH_A05G2382.1
	F	GB_A05G2415.1
	F	GH_A02G1221.1
	F	GB_A02G1244.1
	F	Gorai.013G108400.1
	F	GH_D03G0708.1
	F	GB_D03G0732.1
	F	Ga10G1976.1
	F	GH_A10G1000.1
	F	GB_A10G1037.1
	F	Ga08G2585.1
	F	GB_A08G2614.1
	F	GH_A08G2499.1
	F	GH_D08G2508.1
	F	GB_D08G2607.1
	F	Gorai.004G254500.1
