# Supplementary material for: UDP-glucose pyrophosphorylase: genome-wide identification, expression and functional analyses in Gossypium hirsutum
Source: PeerJ. 2022 May 30;10:e13460. doi: 10.7717/peerj.13460 (PMC9161816; doi:10.7717/peerj.13460)
Supplement: Supplemental Information 3 [file peerj-10-13460-s003.xlsx]

## Sheet: Sheet1
Table 2 Isoelectric point and molecular weight of UGP genes
gene ID	pI	Mw
AT3G03250.1	5.8	51.7384
AT5G17310.1	7.64	43.7495
AT2G35020.1	5.64	55.7598
AT1G31070.2	5.76	55.9921
AT5G52560.1	6.07	67.8523
AT3G56040.1	5.97	99.043
AT5G46420.1	5.62	73.7841
evm.model.supercontig_178.21	5.98	51.5723
evm.model.supercontig_30.136	5.84	54.3651
evm.model.supercontig_64.151	7.96	63.3454
evm.model.supercontig_17.110	6.33	72.6223
Ga11G2215.1	5.52	51.2408
Ga08G0443.1	5.74	51.3619
Ga11G1427.1	6.16	68.2834
Ga12G2624.1	6.12	55.0448
Ga03G2792.1	6.21	53.8215
Ga08G2585.1	6.69	68.9215
Ga05G2532.1	6.72	69.6186
Ga10G1976.1	7.59	67.4151
Ga10G0079.1	5.89	90.2218
GB_D11G1820.1	5.45	51.2989
GB_A11G1777.1	5.61	51.2569
GB_D08G0435.1	5.82	51.5421
GB_A08G0429.1	5.99	51.4922
GB_D11G2576.1	6.49	68.3394
GB_A11G2562.1	6.38	68.4386
GB_D12G0489.1	6.12	55.1089
GB_A12G0491.1	6.12	55.0729
GB_A03G2528.1	6.14	53.8005
GB_D02G2659.1	9.46	33.4235
GB_D04G1306.1	9.43	21.7965
GB_D10G1799.1	9.13	25.0106
GB_D03G0732.1	6.81	69.3463
GB_A08G2614.1	6.69	68.9055
GB_A02G1244.1	6.23	69.1869
GB_A10G1037.1	6.93	68.6204
GB_D08G2607.1	5.96	64.5365
GB_A05G2415.1	6.72	69.9089
GB_A10G2815.1	6	96.646
GB_D01G1612.1	8.54	23.7653
GB_D10G2773.1	5.95	96.5189
GB_D09G0263.1	7.51	20.9856
GB_D11G2470.1	5.64	16.5864
GB_A10G0389.1	6.82	75.7749
GB_D04G0528.1	9.6	17.6736
GB_D12G1985.1	8.32	17.6178
GH_D03G0708.1	6.78	69.2792
GH_A02G1221.1	6.12	69.286
GH_A05G2382.1	6.64	72.7813
GH_A10G1000.1	6.93	68.6204
GH_A08G2499.1	6.69	68.8334
GH_D08G2508.1	6.49	67.6302
GH_D02G2606.1	8.92	36.3108
GH_A03G2444.1	6.25	54.6275
GH_A12G0472.1	6.12	55.0448
GH_D12G0484.1	6.12	55.185
GH_D01G1492.1	4.91	19.7466
GH_D11G2547.1	6.35	68.4155
GH_A11G2500.1	6.26	68.3535
GH_A07G1819.1	4.99	25.6925
GH_D11G1805.1	5.45	51.2989
GH_A11G1773.1	5.62	51.315
GH_D08G0444.1	5.82	51.5421
GH_A08G0422.1	5.86	51.4931
GH_D10G2749.1	6	96.6452
Gorai.004G048300.1	5.81	51.5581
Gorai.007G188400.1	5.44	52.8697
Gorai.007G250600.1	6.35	68.3734
Gorai.008G049800.1	6.12	55.2981
Gorai.005G268300.1	6.81	52.6341
Gorai.013G108400.1	6.55	69.1991
Gorai.004G254500.1	6.49	68.9607
Gorai.005G087200.1	9.27	46.8578
Gorai.002G159200.1	8.13	26.6143
Gorai.008G132300.1	6.03	98.8748
Gorai.001G152100.1	4.64	18.1181
Gorai.011G291300.1	6	96.4027
Thecc.04G000500.1.p	5.61	51.309
Thecc.05G236000.1.p	8.43	69.4069
Thecc.02G005900.1.p	5.83	54.9229
Thecc.08G133900.1.p	6.53	68.2399
