# Supplementary material for: UDP-glucose pyrophosphorylase: genome-wide identification, expression and functional analyses in Gossypium hirsutum
Source: PeerJ. 2022 May 30;10:e13460. doi: 10.7717/peerj.13460 (PMC9161816; doi:10.7717/peerj.13460)
Supplement: Supplemental Information 4 [file peerj-10-13460-s004.xlsx]

## Sheet: Sheet1
Table 3 UGD gene family and their PFKM values in TM-1,0-153, and sGK9708.
gene id	TM-1 5DPA	TM-1 10DPA	TM-1 20DPA	TM-1 25DPA	0-153 5DPA	0-153 10DPA	0-153 15DPA	0-153 20DPA	0-153 25DPA	0-153 30DPA	sGK9708 5DPA	sGK9708 10DPA	sGK9708 15DPA	sGK9708 20DPA	sGK9708 25DPA	sGK9708 30DPA
GH_D10G2749	0.570974	0	0	1.18772	0.533802	0.0138023	0	0	0.143586	0	0.29	0.27	0.01	0	0	0
GH_D02G2606	0	0	0	0	0	0	0	0	0	0.017342	0	0	0	0	0	0
GH_A03G2444	0.011411	0.033371	0	0	0	0	0	0	0.0257907	0	0.01	0	0	0	0	0
GH_D12G0484	28.9024	42.399	30.964	17.3462	25.93	32.96	67.36	48.14	28.27	18.07	28.45	31.83	67.34	43.21	21.43	23.96
GH_A12G0472	30.2742	43.6157	54.5555	28.6687	26.14	34.91	75.11	73.07	46.41	32.52	25.79	31.16	67.34	56.69	36.88	48.34
GH_A05G2382	0	0	0	0	0.55	0.32	0.16	0.22	0.38	0.14	0.46	0.35	0.27	0.22	0.27	0.24
GH_A02G1221	0	0	0	0	0	0	0	0	0	0	0.06	0.02	0	0	0	0
GH_D03G0708	0.37744	0.24699	0	0.784738	2.18286	1.83487	1.92184	0.883747	0.447831	0.892482	2.58	0.76	1.35	1.48	0.36	0.42
GH_A10G1000	0	0	0	0	0.517424	1.19675	0.45521	0.318414	0.254612	0.564	0.8	0.7	0.58	0.27	0.3	0.31
GH_D08G2508	0	0	0	0	0	0	0	0	0	0	0	0	0	0	0	0
GH_A08G2499	6.71118	6.25906	1.00495	8.34471	6.78	6.67532	7.26083	4.13521	4.72984	2.73029	9.04	7.84	5.55	4.54	4.28	3.32
GH_D01G1492	0	0	0	0	0.290877	0.00393767	0.023712	0.027496	0.102174	0.0634325	0.35	0.04	0.05	0.04	0.32	0.05
GH_A11G2500	0.870038	2.39921	0.922389	1.66599	1.96467	3.57356	3.59655	2.22593	2.10618	2.53913	3.92	2.07	5.79	2.44	1.5	2.08
GH_D11G2547	5.93677	2.49719	3.71984	1.01812	6.67699	3.9542	3.79954	1.98243	2.92802	2.22903	7.43	3.84	3.82	1.68	1.14	1.44
GH_A07G1819	0	0	0.035641	0	0	0	0	0	0	0	0	0	0	0	0	0
GH_A11G1773	183.999	140.161	66.3291	79.8729	95.11	81.38	101.56	56.01	52.48	50.09	100.8	67.61	108.77	64.4	55.08	46.9
GH_D11G1805	51.2358	35.2972	8.40524	13.9189	24.46	19.91	22.15	9.07	13.54	9.01	27.01	24.32	20.42	11.31	8.83	6.7
GH_A08G0422	11.1298	10.7132	2.31004	1.01394	5.49	9.52	20.16	7.33	3.72	2.65	6.52	6.83	14.57	7.54	3.3	5.16
GH_D08G0444	75.9782	55.1033	12.0859	6.42041	13.66	13.65	5.82	7.52	3.83	3.14	18.86	12.96	6.15	7.11	2.33	2.99
