# Supplementary material for: UDP-glucose pyrophosphorylase: genome-wide identification, expression and functional analyses in Gossypium hirsutum
Source: PeerJ. 2022 May 30;10:e13460. doi: 10.7717/peerj.13460 (PMC9161816; doi:10.7717/peerj.13460)
Supplement: Supplemental Information 5 [file peerj-10-13460-s005.xlsx]

## Sheet: Sheet1
Table 4 qRT-PCR analysis of six UGP genes highly expressed in 0-153 and sGK9708.									Analysis of qRT-PCR data using TBtools
	GhHistone3	GH_A08G0422	GH_D08G0444	GH_A12G0472	GH_D12G0484	GH_A11G1773	GH_D11G1805			GH_A08G0422		GH_D08G0444		GH_A12G0472		GH_D12G0484		GH_A11G1773		GH_D11G1805
0-153-5DPA	20.43	24.29	24.74	24.06	24.29	22.02	24.11			Mean	Stdev	Mean	Stdev	Mean	Stdev	Mean	Stdev	Mean	Stdev	Mean	Stdev
0-153-5DPA	20.27	24.8	24.33	27	23.98	21.19	22.67		0-153-5DPA	1.04762	0.389412	1.00687	0.141931	1.00231	0.0823076	1.03197	0.305035	1.00074	0.0466955	1.08328	0.507708
0-153-5DPA	20.33	23.72	24.47	24.29	24.87	21.32	20.88		0-153-10DPA	0.8715	0.263053	0.934125	0.0558447	1.08779	0.16313	1.53636	0.469162	0.666706	0.104759	7.80028	0.15697
0-153-10DPA	20.97	25.56	25.15	24.44	24.86	21.63	20.88		0-153-15DPA	2.00893	0.233813	3.59216	0.199608	5.05194	0.423787	6.71337	0.186116	1.4812	0.0214381	9.00913	1.17341
0-153-10DPA	20.97	24.71	25.12	24.77	23.98	24.8	20.83		0-153-20DPA	1.23581	0.0815717	0.458504	0.0270644	1.93349	0.184066	2.13087	0.115614	0.735508	0.0128514	3.88485	0.376545
0-153-10DPA	20.51	24.71	24.99	24.34	24.02	22.53	20.88		0-153-25DPA	4.0624	0.278927	1.90864	0.26316	0.980719	0.332108	5.33291	0.549023	1.43202	0.221877	8.73389	0.73317
0-153-15DPA	21.33	24.38	23.72	22.83	22.72	21.78	21.08		0-153-30DPA	0.32622	0.0113405	0.327254	0.0596949	1.64192	0.486359	1.02615	0.413788	0.303721	0.127603	2.16236	0.619531
0-153-15DPA	21.69	24.51	23.85	23.05	22.68	21.77	21.3		SGK9708-5DPA	2.16407	0.35483	3.01197	0.116176	1.61023	0.485658	2.28762	0.383278	1.8547	0.179301	14.7951	0.413017
0-153-15DPA	21.27	24.18	23.7	22.84	22.76	21.74	21.45		SGK9708-10DPA	2.07941	0.161976	2.17375	0.255772	1.01136	0.44048	2.14615	0.373537	1.21074	0.0871616	9.27491	0
0-153-20DPA	21.99	26.24	27.13	24.68	24.94	23.22	22.96		SGK9708-15DPA	2.99207	0.146968	2.44419	0.387524	2.62192	0.379135	4.00134	0.126452	0.913684	0.10773	5.43081	0.944966
0-153-20DPA	21.86	26.43	30.16	24.69	24.82	23.27	22.82		SGK9708-20DPA	1.75238	0.240713	1.37114	0.0884095	3.63209	0.148983	3.12492	0.524201	0.977969	0.0483962	5.51791	0.221765
0-153-20DPA	21.86	26.31	27.3	24.93	24.79	23.25	23.1		SGK9708-25DPA	0.314126	0.0604269	0.252043	0.047318	1.16681	0.128842	1.23152	0.0368977	0.54351	0.0152752	2.97191	0.704555
0-153-25DPA	21.88	24.28	24.82	23.8	23.33	24.44	21.62		SGK9708-30DPA	0.239202	0.0379502	0.203194	0.044777	0.893702	0.158413	1.06713	0.0305999	0.176819	0.0155376	1.18049	0.0899127
0-153-25DPA	21.83	24.29	30.67	25.14	23.57	22.03	21.83
0-153-25DPA	21.9	24.46	25.22	26.04	23.59	22.9	21.82
0-153-30DPA	22.1	27.64	28.11	24.95	25.63	24.23	23.83
0-153-30DPA	21.74	27.74	28.06	25.08	26.22	24.85	24.62
0-153-30DPA	22.59	27.68	27.65	25.83	26.82	25.47	23.81
SGK9708-5DPA	21.11	24.04	23.54	23.9	24.05	20.81	20.02
SGK9708-5DPA	20.95	23.67	23.55	23.76	24.76	20.54	20.75
SGK9708-5DPA	20.74	23.57	23.45	24.66	23.56	21.09	20.1
SGK9708-10DPA	20.24	23.05	23.55	23.99	22.41	20.85	22.98
SGK9708-10DPA	20.46	23.23	23.32	23.62	23.53	21.05	20.1
SGK9708-10DPA	20.21	23.25	23.21	25.01	25.02	20.89	20.1
SGK9708-15DPA	22.6	25	25.32	24.89	24.65	23.47	23.45
SGK9708-15DPA	22.62	24.89	25.45	24.97	24.62	23.77	24.02
SGK9708-15DPA	22.65	25.02	25.78	25.3	24.71	23.74	22.95
SGK9708-20DPA	22.44	25.17	25.72	24.05	24.74	22.95	22.69
SGK9708-20DPA	21.84	25.42	25.9	23.96	24.46	22.99	22.6
SGK9708-20DPA	21.95	25.02	25.76	24.07	24.25	23.09	22.58
SGK9708-25DPA	23.87	29.96	29.98	27.44	27.72	25.82	25.84
SGK9708-25DPA	24	29.42	30.51	27.76	27.79	25.79	25.14
SGK9708-25DPA	24.14	29.48	30.05	27.59	27.71	25.74	25.43
SGK9708-30DPA	22.44	28.34	28.9	26.25	26.05	25.48	24.71
SGK9708-30DPA	21.89	27.9	28.51	26.12	25.99	25.33	24.91
SGK9708-30DPA	21.85	27.95	28.25	25.77	25.97	25.58	24.88
