# Supplementary material for: UDP-glucose pyrophosphorylase: genome-wide identification, expression and functional analyses in Gossypium hirsutum
Source: PeerJ. 2022 May 30;10:e13460. doi: 10.7717/peerj.13460 (PMC9161816; doi:10.7717/peerj.13460)
Supplement: Supplemental Information 6 [file peerj-10-13460-s006.xlsx]

## Sheet: Sheet1
Table 5 Statistical analysis of phenotypic variation of fiber mass area at different concentrations.
Hormone concentration（mM)	CK	IAA（0.1）	IAA（0.5）	IAA（1.0）	GA3（0.1）	GA3（0.5）	GA3（1.0）	ABA（0.1）	ABA（0.5）	ABA（1.0）	ETH（0.1）	ETH（0.5）	ETH（1.0）	SA（0.1）	SA（0.5）	SA（1.0）
Fiber area（mm2)	90.45	121.92	103.01	108.27	125.83	76.95	102.05	20.12	70.75	52.65	52.61	112.98	73.63	51.35	45.91	36.82
	100.95	97.19	101.13	95.27	116.11	78.38	105.88	19.19	78.91	47.53	47.81	94.79	74.28	27.23	52.86	26.19
	104.32	103.36		108.22		86.47	105.46	20.55	69.55	33.51		64.36	76.25	36.54	47.07	30.22
	91.52	109.33		104.09				21.33				92.78	45.27
				95.86									92.26
				102.56									80.07
Hormone concentration（mM)	CK	IAA（0.1）	IAA（0.5）	IAA（1.0）	GA3（0.1）	GA3（0.5）	GA3（1.0）	ABA（0.1）	ABA（0.5）	ABA（1.0）	ETH（0.1）	ETH（0.5）	ETH（1.0）	SA（0.1）	SA（0.5）	SA（1.0）
Average fibre area（mm2)	96.81	107.95	102.07	102.378	120.97	80.6	104.463	20.2975	73.07	44.5633	50.21	91.2275	73.6267	38.3733	48.6133	31.0767
T-test		0.127302	0.368271	0.201104	0.0153966	0.0192235	0.127643	5.67212e-07	0.00413304	0.000410902	0.000966852	0.617812	0.0241882	0.000445118	0.000116389	3.82158e-05
STDEVA	6.87928	10.5501	1.32936	5.74137	6.87308	5.1336	2.10053	0.892165	5.09305	9.90887	3.39411	20.0843	15.4928	12.1641	3.72318	5.36653
Range of error	3.43964	5.27503	0.94	2.17003	4.86	2.96389	1.21274	0.446082	2.94048	5.72089	2.4	10.0421	6.32489	7.02293	2.14958	3.09837
