# Supplementary material for: UDP-glucose pyrophosphorylase: genome-wide identification, expression and functional analyses in Gossypium hirsutum
Source: PeerJ. 2022 May 30;10:e13460. doi: 10.7717/peerj.13460 (PMC9161816; doi:10.7717/peerj.13460)
Supplement: Supplemental Information 7 [file peerj-10-13460-s007.xlsx]

## Sheet: Sheet1
Table 6 The relative expression levels of the six genes in the ovule at 15 DPA after hormone treatment were verified by qRT-PCR.										Analysis of qRT-PCR data using TBtools
	Hormone concentration（mM)	GhHistone3	GH_A08G0422	GH_D08G0444	GH_A12G0472	GH_D12G0484	GH_A11G1773	GH_D11G1805		Hormone concentration（mM)	GH_A08G0422		GH_D08G0444		GH_A12G0472		GH_D12G0484		GH_A11G1773		GH_D11G1805
15DPA	ck	22.43	30	29.93	27.08	27.15	24.79	23.92			Mean	Stdev	Mean	Stdev	Mean	Stdev	Mean	Stdev	Mean	Stdev	Mean	Stdev
15DPA	ck	22.07	29.62	29.68	26.8	26.79	24.16	23.85		ck	1.01032	0.171893	1.00259	0.0873249	1.00314	0.0969773	1.00583	0.129494	1.00519	0.124803	1.0002	0.0243037
15DPA	ck	22.17	29.51	29.76	26.93	26.85	24.43	24.24		0.5 IAA	5.841	0.455007	4.00951	0.0555823	1.47427	0	1.75348	0.152257	0.952744	0.0173936	1.13061	0.0338745
15DPA	0.5 IAA	21.02	25.88	26.3	25.44	24.82	23.54	22.51		1 IAA	4.13837	0.295738	3.29241	0.368391	1.37303	0.0523163	1.46419	0.0211918	2.00559	0.0757343	1.50895	0.0320571
15DPA	0.5 IAA	21.13	26.02	26.64	25.21	24.99	23.1	22.59		0.5 GA3	3.63964	0.319312	2.76036	0.15707	0.781869	0.105223	0.908473	0.0512201	1.09016	0.054993	1.07522	0.0560156
15DPA	0.5 IAA	21.02	26.1	26.62	25.21	25.06	23.49	22.52		1 GA3	1.28127	0.055964	0.933428	0.0334102	0.714322	0.0371775	0.918478	0.0339809	0.960703	0.063898	1.11066	0.0610197
15DPA	1 IAA	20.53	25.84	26.44	24.83	24.65	21.87	21.55		0.5 ABA	3.74326	0.168672	2.5379	0.219257	1.25706	0.0132876	1.384	0.0940372	1.44129	0.0544254	1.22567	0.0274644
15DPA	1 IAA	20.59	26.02	26.48	24.77	24.69	21.86	21.61		1 ABA	1.44858	0.0754661	0.970915	0.0385619	0.47161	0.0323811	0.819651	0.0658049	0.740867	0.0264007	0.725981	0.0386174
15DPA	1 IAA	20.43	26.01	26.19	24.72	24.68	21.96	21.59		0.5 SA	2.17639	0.332387	2.53401	0.335891	0.760368	0.100181	0.769752	0.147164	0.788329	0.0685215	0.841759	0.0466591
15DPA	0.5 GA3	21.05	26.29	26.71	25.56	25.46	22.88	22.18		1 SA	0.607367	0.170824	0.603114	0.0528733	1.19579	0.062297	0.836115	0.087718	1.00256	0.0862388	0.973917	0.0607266
15DPA	0.5 GA3	20.52	26.22	26.85	25.88	25.56	23.02	22.26		0.5 ETH	1.88802	0.0392582	2.4492	0.262394	0.85337	0.0835608	0.813828	0.0618771	0.747548	0.0165597	1.15404	0.00925795
15DPA	0.5 GA3	20.53	26.47	26.85	25.89	25.62	22.98	22.33		1 ETH	1.31881	0.230814	1.36836	0.192138	0.566463	0.00598772	0.678788	0.0317229	0.891806	0.0496964	0.728858	0.0203467
15DPA	1 GA3	20.46	27.53	27.96	25.63	25.22	22.71	21.9
15DPA	1 GA3	20.29	27.41	28.06	25.48	25.2	22.9	21.91
15DPA	1 GA3	20.3	27.5	28.03	25.54	25.12	22.77	21.77
15DPA	0.5 ABA	20.72	26.22	26.42	24.59	24.34	22.13	21.59
15DPA	0.5 ABA	20.15	25.72	26.32	24.58	24.52	22.04	21.6
15DPA	0.5 ABA	19.76	25.84	26.57	24.61	24.49	22.03	21.54
15DPA	1 ABA	20.23	26.91	27.58	25.77	25.04	22.82	22.19
15DPA	1 ABA	19.97	26.99	27.69	25.78	25.14	22.82	22.21
15DPA	1 ABA	19.9	27.06	27.66	25.95	24.91	22.91	22.07
15DPA	0.5 SA	20.57	26.93	26.64	25.46	25.73	23.11	22.28
15DPA	0.5 SA	20.31	26.5	26.62	25.56	25.19	23.07	22.5
15DPA	0.5 SA	19.99	26.57	26.31	25.2	25.26	22.88	22.12
15DPA	1 SA	20.93	29.49	28.95	25.25	25.52	23.04	22.51
15DPA	1 SA	20.95	28.74	29.17	25.18	25.77	23.02	22.33
15DPA	1 SA	20.28	28.68	28.94	25.1	25.78	23.25	22.42
15DPA	0.5 ETH	19.98	25.83	26.51	24.86	25.18	22.9	21.52
15DPA	0.5 ETH	19.98	26.66	26.31	25.14	24.96	22.85	21.52
15DPA	0.5 ETH	20.22	26.6	26.2	25.42	25.06	22.84	21.5
15DPA	1 ETH	20.72	27.26	27.24	25.87	25.53	22.92	22.42
15DPA	1 ETH	20.24	27.32	27.54	25.89	25.64	22.8	22.45
15DPA	1 ETH	20.06	27.75	27.61	25.86	25.65	22.95	22.5
