# Supplementary material for: UDP-glucose pyrophosphorylase: genome-wide identification, expression and functional analyses in Gossypium hirsutum
Source: PeerJ. 2022 May 30;10:e13460. doi: 10.7717/peerj.13460 (PMC9161816; doi:10.7717/peerj.13460)
Supplement: Supplemental Information 9 [file peerj-10-13460-s009.xlsx]

## Sheet: Sheet1
Table 8 Relative expression levels of six genes in 15 DPA ovules after hormone treatment, and statistical significance levels were tested by normalized qRT-PCR
	Hormone concentration（mM)	GhHistone3	GH_A08G0422	GH_D08G0444	GH_A12G0472	GH_D12G0484	GH_A11G1773	GH_D11G1805
	ck	22	29.57	29.5	26.65	26.72	24.36	23.49
	ck	22	29.55	29.61	26.73	26.72	24.09	23.78
	ck	22	29.34	29.59	26.76	26.68	24.26	24.07
	0.5 IAA	22	26.86	27.28	26.42	25.8	24.52	23.49
	0.5 IAA	22	26.89	27.51	26.08	25.86	23.97	23.46
	0.5 IAA	22	27.08	27.6	26.19	26.04	24.47	23.5
T-test			1.46357e-05	3.15463e-05	0.0101427	0.000388171	0.687361	0.151914
	1 IAA	22	27.31	27.91	26.3	26.12	23.34	23.02
	1 IAA	22	27.43	27.89	26.18	26.1	23.27	23.02
	1 IAA	22	27.58	27.76	26.29	26.25	23.53	23.16
T-test			4.44921e-05	7.78055e-06	0.000831864	0.000355277	0.00149953	0.0148043
	0.5 GA3	22	27.24	27.66	26.51	26.41	23.83	23.13
	0.5 GA3	22	27.7	28.33	27.36	27.04	24.5	23.74
	0.5 GA3	22	27.94	28.32	27.36	27.09	24.45	23.8
T-test			0.00103824	0.00284847	0.271707	0.557791	0.923892	0.457324
	1 GA3	22	29.07	29.5	27.17	26.76	24.25	23.44
	1 GA3	22	29.12	29.77	27.19	26.91	24.61	23.62
	1 GA3	22	29.2	29.73	27.24	26.82	24.47	23.47
T-test			0.0125346	0.331992	0.000234189	0.0537756	0.190079	0.200709
	0.5 ABA	22	27.5	27.7	25.87	25.62	23.41	22.87
	0.5 ABA	22	27.57	28.17	26.43	26.37	23.89	23.45
	0.5 ABA	22	28.08	28.81	26.85	26.73	24.27	23.78
T-test			0.000849898	0.014344	0.31245	0.226981	0.219122	0.258788
	1 ABA	22	28.68	29.35	27.54	26.81	24.59	23.96
	1 ABA	22	29.02	29.72	27.81	27.17	24.85	24.24
	1 ABA	22	29.16	29.76	28.05	27.01	25.01	24.17
T-test			0.0292307	0.763998	0.001972	0.0507323	0.0163397	0.140853
	0.5 SA	22	28.36	28.07	26.89	27.16	24.54	23.71
	0.5 SA	22	28.19	28.31	27.25	26.88	24.76	24.19
	0.5 SA	22	28.58	28.32	27.21	27.27	24.89	24.13
T-test			0.00118406	0.00011283	0.027226	0.0274169	0.0187157	0.365347
	1 SA	22	30.56	30.02	26.32	26.59	24.11	23.58
	1 SA	22	29.79	30.22	26.23	26.82	24.07	23.38
	1 SA	22	30.4	30.66	26.82	27.5	24.97	24.14
T-test			0.0360524	0.0187987	0.240622	0.390183	0.654649	0.791036
	0.5 ETH	22	27.85	28.53	26.88	27.2	24.92	23.54
	0.5 ETH	22	28.68	28.33	27.16	26.98	24.87	23.54
	0.5 ETH	22	28.38	27.98	27.2	26.84	24.62	23.28
T-test			0.00953952	0.00143394	0.0257483	0.0468498	0.00962918	0.158186
	1 ETH	22	28.54	28.52	27.15	26.81	24.2	23.7
	1 ETH	22	29.08	29.3	27.65	27.4	24.56	24.21
	1 ETH	22	29.69	29.55	27.8	27.59	24.89	24.44
T-test			0.322889	0.228399	0.0146597	0.0759162	0.217468	0.288635
