# Supplementary material for: UDP-glucose pyrophosphorylase: genome-wide identification, expression and functional analyses in Gossypium hirsutum
Source: PeerJ journal article supplement (doi:10.7717/peerj.13460), 2022-05-30

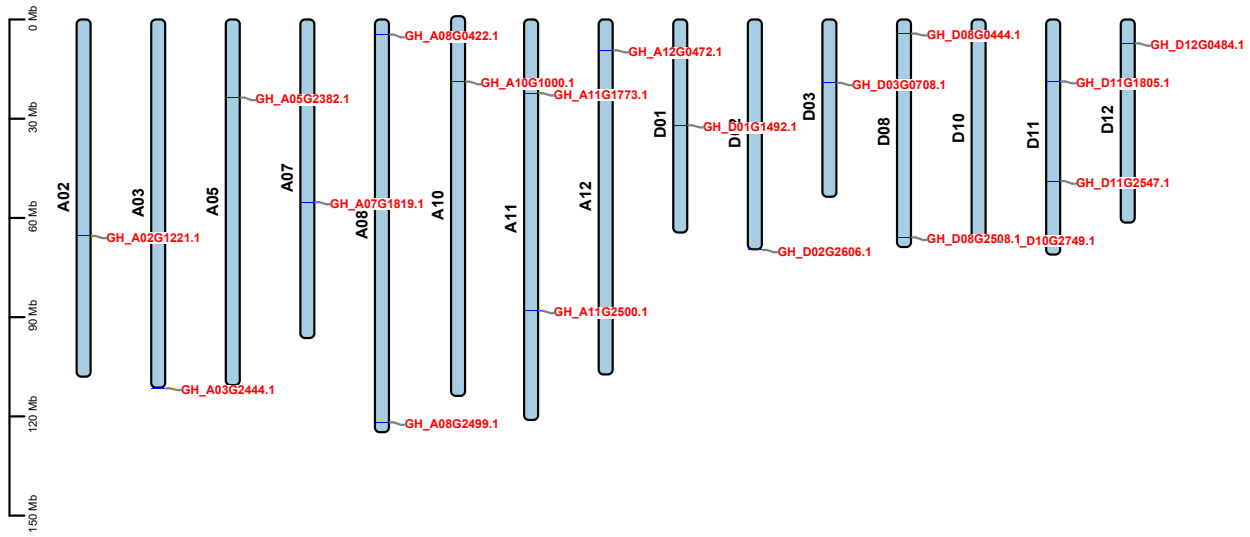

Supplement: Supplementary_Figure_1.pdf [file Supplementary_Figure_1.pdf]
